# Supplementary material
Source: PubMed Central journal article supplement (PMC6961837)
Supplement: NIHMS1041244-supplement-S1.pdf [file NIHMS1041244-supplement-S1.pdf]

## E Briski *et al.* – Supporting Information

**WebTable 1. Examples of selection during entrainment and transport for vectors of intentional introductions**

| <i>Vector</i>                | <i>Taxa</i> | <i>Selection during entrainment into transport</i>                                                      | <i>Selection during transport</i>                                                            | <i>References</i>                                |
|------------------------------|-------------|---------------------------------------------------------------------------------------------------------|----------------------------------------------------------------------------------------------|--------------------------------------------------|
| Acclimatization societies    | Diverse     | Healthy and strong individuals chosen for introduction                                                  | No or mild selection, as transport will be organized to produce as little stress as possible | Lever (1992)                                     |
| Agriculture and horticulture | Diverse     | Populations adapted to human-altered habitats – “anthropogenically induced adaptation to invade” (AIAI) | No or mild selection, as transport will be organized to produce as little stress as possible | No study, but AIAI (Hufbauer <i>et al.</i> 2012) |
| Aquaculture                  | Diverse     | Populations adapted to human-altered habitats (AIAI)                                                    | No or mild selection, as transport will be organized to produce as little stress as possible | No study, but AIAI (Hufbauer <i>et al.</i> 2012) |
| Pet trade                    | Diverse     | Populations adapted to human-altered habitats (AIAI)                                                    | No or mild selection, as transport will be organized to produce as little stress as possible | No study, but AIAI (Hufbauer <i>et al.</i> 2012) |

### WebReferences

Hufbauer RA, Facon B, Ravigné V, *et al.* 2012. Anthropogenically induced adaptation to invade (AIAI): contemporary adaptation to human-altered habitats within the native range can promote invasions. *Evol Appl* **5**: 89–101.

Lever C. 1992. They dined on eland: the story of acclimatization societies. London, UK: Quiller Press.
