# Supplementary material
Source: PubMed Central journal article supplement (PMC6961837)
Supplement: NIHMS1041244-supplement-S2.pdf [file NIHMS1041244-supplement-S2.pdf]

**E Briski *et al.* – Supporting Information**

**WebTable 2. Examples of selection during entrainment and transport for vectors of unintentional introductions**

| <i>Vector</i>                                                                          | <i>Taxa</i>                                          | <i>Selection during entrainment into transport</i>                                          | <i>Evidence</i> | <i>Selection during transport</i>                                                                                                                                                                    | <i>Evidence</i> | <i>References</i>                                           |
|----------------------------------------------------------------------------------------|------------------------------------------------------|---------------------------------------------------------------------------------------------|-----------------|------------------------------------------------------------------------------------------------------------------------------------------------------------------------------------------------------|-----------------|-------------------------------------------------------------|
| Ship hull fouling                                                                      | Bryozoan<br>( <i>Watersipora subtorquata</i> )       |                                                                                             |                 | Fouling bryozoan developed tolerance to copper due to the application of anti-fouling paints                                                                                                         | Strong*         | McKenzie <i>et al.</i> (2011, 2012a,b)                      |
| Ship full fouling                                                                      | Diverse                                              | Short residence time of vessels may select for early successional fouling organisms         | Probable*       |                                                                                                                                                                                                      |                 | Berntsson and Jonsson (2003); Chapman <i>et al.</i> (2013)  |
| Ship ballast water                                                                     | Diverse invertebrates                                | Non-random entrainment of invertebrates may select for tolerance to human disturbance       | Probable*       |                                                                                                                                                                                                      |                 | Briski <i>et al.</i> (2012)                                 |
| Diverse (eg pet trade)                                                                 | Birds                                                | Populations adapted to human-altered habitats (AIAI)                                        | Probable*       |                                                                                                                                                                                                      |                 | Hufbauer <i>et al.</i> (2012); Sol <i>et al.</i> (2017)     |
| Diverse (eg hitchhikers and contaminants associated with agriculture and horticulture) | Little fire ant<br>( <i>Wasmannia auropunctata</i> ) | Populations from human-altered habitats are more tolerant of hot and dry conditions (AIAI)  | Probable*       |                                                                                                                                                                                                      |                 | Hufbauer <i>et al.</i> (2012); Foucaud <i>et al.</i> (2013) |
| Diverse (eg ship ballast water and hull fouling)                                       | Asian green mussel<br>( <i>Perna viridis</i> )       | Populations from human-altered habitats are more tolerant of low oxygen environments (AIAI) | Probable*       |                                                                                                                                                                                                      |                 | Hufbauer <i>et al.</i> (2012); Huhn <i>et al.</i> (2016)    |
| Ship ballast water                                                                     | Planktonic                                           |                                                                                             |                 | Low oxygen and light levels, metal pollutants, and/or fluctuations in temperature and salinity may select for tolerance of harsh environmental conditions common in ports and human-altered habitats | Probable*       | Briski <i>et al.</i> (2014); Chan <i>et al.</i> (2015)      |

| <i>Vector</i>                 | <i>Taxa</i>                                                                                  | <i>Selection during entrainment into transport</i> | <i>Evidence</i> | <i>Selection during transport</i>                                                                                                                                                                                                                              | <i>Evidence</i> | <i>References</i>                          |
|-------------------------------|----------------------------------------------------------------------------------------------|----------------------------------------------------|-----------------|----------------------------------------------------------------------------------------------------------------------------------------------------------------------------------------------------------------------------------------------------------------|-----------------|--------------------------------------------|
| Wood packing materials        | Emerald ash borer ( <i>Agrilus planipennis</i> )                                             |                                                    |                 | Phytosanitary heat treatment of wood products induces a heat shock response of the wood-boring insects, allowing individuals to survive otherwise lethal temperatures                                                                                          | Probable*       | Sobek <i>et al.</i> (2011)                 |
| Ship hull fouling             | Fanwort ( <i>Cabomba caroliniana</i> )                                                       |                                                    |                 | Overland transport on boat trailers may select for desiccation tolerance, which may promote the introduction and subsequent spread of non-indigenous populations in recipient ecosystems                                                                       | Probable*       | Barnes <i>et al.</i> (2013); Bickel (2014) |
| Ship hull fouling             | Ascidians ( <i>Styela clava</i> , <i>Botrylloides violaceus</i> , <i>Didemnum vexillum</i> ) |                                                    |                 | Hydrodynamic conditions experienced by fouling ascidians on the hulls of ships during voyages may act as a selective pressure, favoring individuals with high attachment strength and/or low drag coefficient, which may promote further spread of the species | Probable*       | Clarke Murray <i>et al.</i> (2012)         |
| Tsunami marine debris objects | Macro- and micro-invertebrates, fish, and protists                                           |                                                    |                 | Limited food source, increased sun exposure, and other stressors may select for populations with broad physiological tolerances                                                                                                                                | No direct*      | Carlton <i>et al.</i> (2017)               |
| Marine litters (eg plastic)   | Macro- and micro-invertebrates, fish, and protists                                           |                                                    |                 | Limited food source, increased sun exposure, and other stressors may select for populations with broad physiological tolerances                                                                                                                                | No direct*      | Kiessling <i>et al.</i> (2015)             |

**Notes:** \*strong evidence, probable and no direct evidence represent: (1) cases with clear evidence for both selection during transport and evolved traits that contribute to invasion success; (2) cases that impose selective pressures relevant to adaptation to invade, but there is no study to demonstrate selection; and (3) cases where there is some reason to believe that selection is occurring, but we can only suggest why this might make a difference for invasion success, respectively.

## WebReferences

- Barnes MA, Jerde CL, Keller D, *et al.* 2013. Viability of aquatic plant fragments following desiccation. *Invas Plant Sci Mana* **6**: 320–25.
- Berntsson KM and Jonsson PR. 2003. Temporal and spatial patterns in recruitment and succession of a temperate marine fouling assemblage: a comparison of static panels and boat hulls during the boating season. *Biofouling* **19**: 187–95.
- Bickel TO. 2014. A boat hitchhiker's guide to survival: *Cabomba caroliniana* desiccation resistance and survival ability. *Hydrobiologia* **746**: 123–34.
- Briski E, Bailey SA, Casas-Monroy O, *et al.* 2012. Relationship between propagule pressure and colonization pressure in invasion ecology: a test with ships' ballast. *P Roy Soc B-Biol Sci* **279**: 2990–97.
- Briski E, Chan F, MacIsaac HJ, and Bailey SA. 2014. A conceptual model of community dynamics during the transport stage of the invasion process: a case study of ships' ballast. *Divers Distrib* **20**: 236–44.
- Carlton JT, Chapman JW, Geller JB, *et al.* 2017. Tsunami-driven rafting: transoceanic species dispersal and implications for marine biogeography. *Science* **357**: 1402–06.
- Chan FT, Bradie J, Briski E, *et al.* 2015. Assessing introduction risk using species' rank-abundance distributions. *P Roy Soc B-Biol Sci* **282**: 20141517.
- Chapman J, Breitenstein R, and Carlton J. 2013. Port-by-port accumulations and dispersal of hull fouling invertebrates between the Mediterranean Sea, the Atlantic Ocean and the Pacific Ocean. *Aquat Invasions* **8**: 249–60.
- Clarke Murray C, Therriault TW, and Martone PT. 2012. Adapted for invasion? Comparing attachment, drag and dislodgment of native and nonindigenous hull fouling species. *Biol Invasions* **14**: 1651–63.
- Foucaud J, Rey O, Robert S, *et al.* 2013. Thermotolerance adaptation to human-modified habitats occurs in the native range of the invasive ant *Wasmannia auropunctata* before long-distance dispersal. *Evol Appl* **6**: 721–34.
- Hufbauer RA, Facon B, Ravigné V, *et al.* 2012. Anthropogenically induced adaptation to invade (AIAI): contemporary adaptation to human-altered habitats within the native range can promote invasions. *Evol Appl* **5**: 89–101.
- Huhn M, Hattich GS, Zamani NP, *et al.* 2016. Tolerance to stress differs between Asian green mussels *Perna viridis* from the impacted Jakarta Bay and from natural habitats along the coast of West Java. *Mar Pollut Bull* **110**: 757–66.
- Kiessling T, Gutow L, and Thiel M. 2015. Marine litter as habitat and dispersal vector. In: Bergmann M, Gutow L, and Klages M (Eds). *Marine anthropogenic litter*. Cham, Switzerland: Springer Open.
- McKenzie L, Brooks R, and Johnston EL. 2011. Heritable pollution tolerance in a marine invader. *Environ Res* **111**: 926–32.
- McKenzie LA, Johnston EL, and Brooks R. 2012a. Using clones and copper to resolve the genetic architecture of metal tolerance in a marine invader. *Ecol Evol* **2**: 1319–29.
- McKenzie LA, Brooks RC, and Johnston EL. 2012b. A widespread contaminant enhances invasion success of a marine invader. *J Appl Ecol* **49**: 767–33.
- Sobek S, Rajamohan A, Dillon D, *et al.* 2011. High temperature tolerance and thermal plasticity in emerald ash borer *Agrilus planipennis*. *Agric Forest Entomol* **13**: 333–40.
- Sol D, González-Lagos C, Lapiedra O, *et al.* 2017. Why are exotic birds so successful in urbanized environments? In: Murgui E and Hedblom M (Eds). *Ecology and conservation of birds in urban environments*. Cham, Switzerland: Springer International Publishing.
